# Supplementary material for: Immunological Properties of Human Embryonic Stem Cell-Derived Retinal Pigment Epithelial Cells
Source: PubMed Central journal article supplement — Stem Cell Reports. 2018 Aug 16;11(3):681–95. doi: 10.1016/j.stemcr.2018.07.009 (PMC6135721; doi:10.1016/j.stemcr.2018.07.009), 2018-08-16
Supplement: mmc1.pdf [file mmc1.pdf]

**Stem Cell Reports, Volume 11**

**Supplemental Information**

**Immunological Properties of Human Embryonic Stem Cell-Derived Retinal Pigment Epithelial Cells**

**Masha Idelson, Ruslana Alper, Alexey Obolensky, Nurit Yachimovich-Cohen, Jacob Rachmilewitz, Ayala Ejzenberg, Ekaterina Beider, Eyal Banin, and Benjamin Reubinoff**

## SUPPLEMENTAL INFORMATION

**Figure S1**

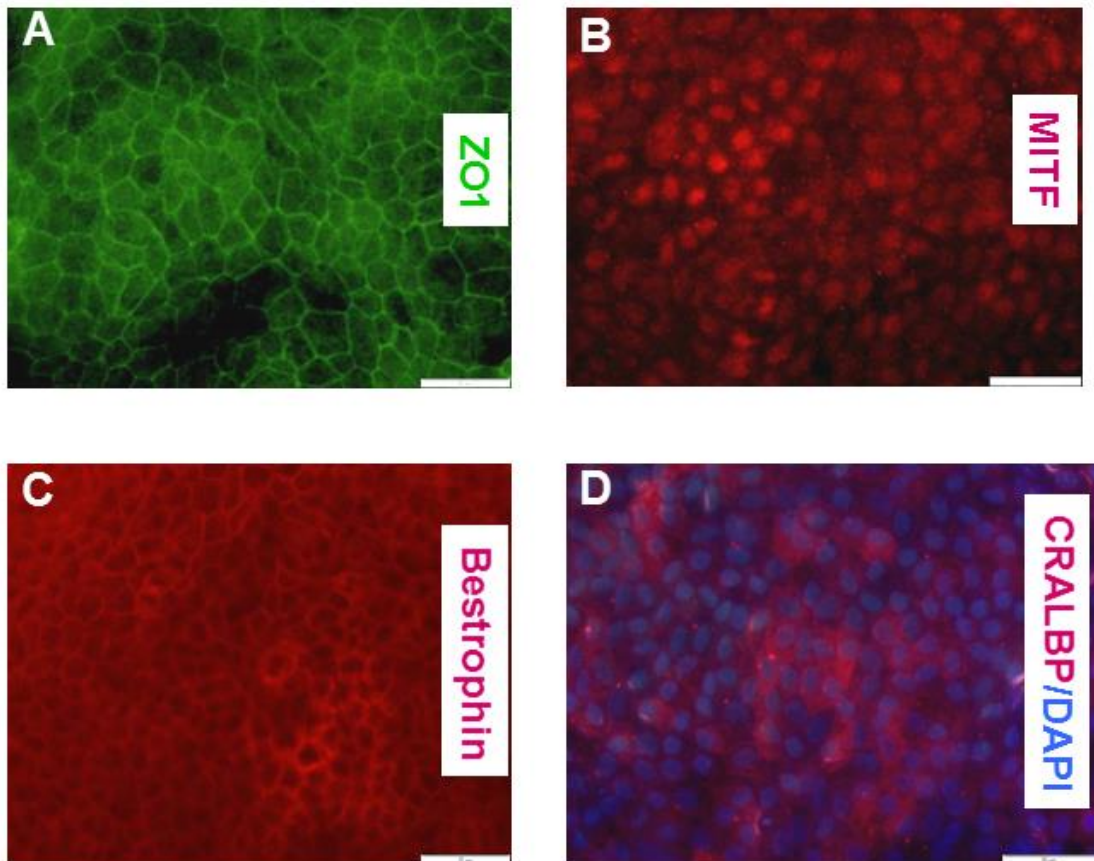

**Human ESC - derived pigmented cells are putative RPE cells**

Immunostaining showing the expression of markers of early (MiTF (B)) and mature (ZO-1(A), CRALBP (D), Bestrophin (C)) RPE cells. Scale bars: (A-D) 50 $\mu$ m.

**Figure S2**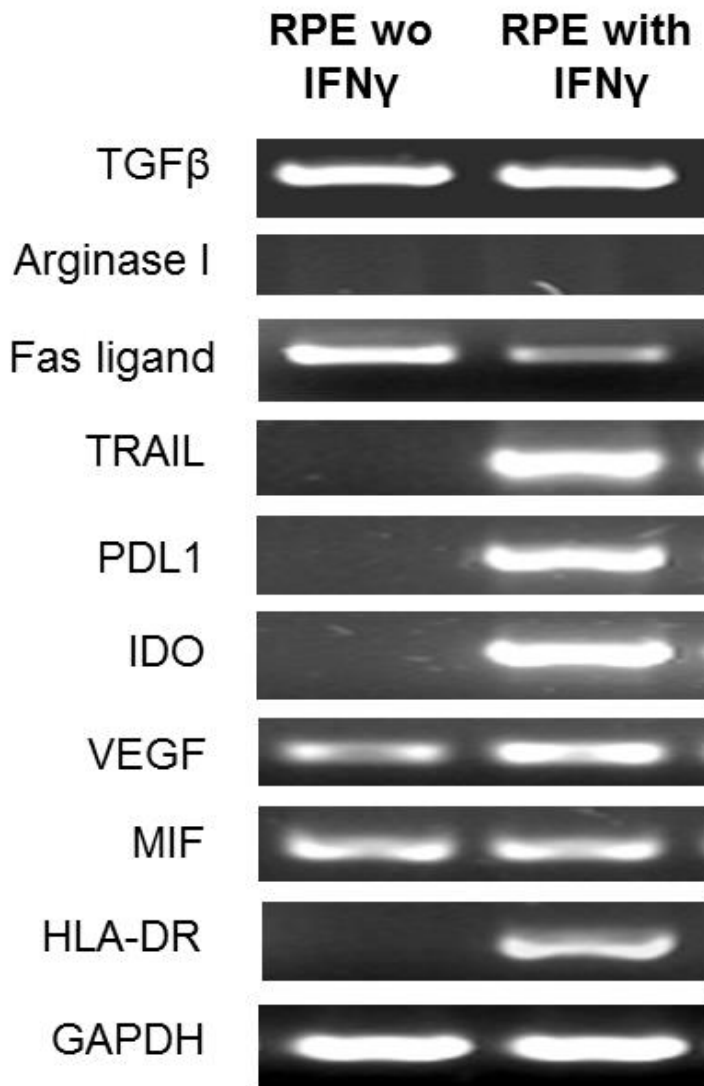**Expression of immunomodulatory molecules by hESC-RPE cells**

RT-PCR analysis of the expression of immunomodulatory molecules, TGF $\beta$ , Arginase I, Fas ligand, TRAIL, PDL1, IDO, VEGF, MIF and HLA-DR by RPE cells cultured for 3 days in the presence or absence of IFN $\gamma$ .

Figure S3

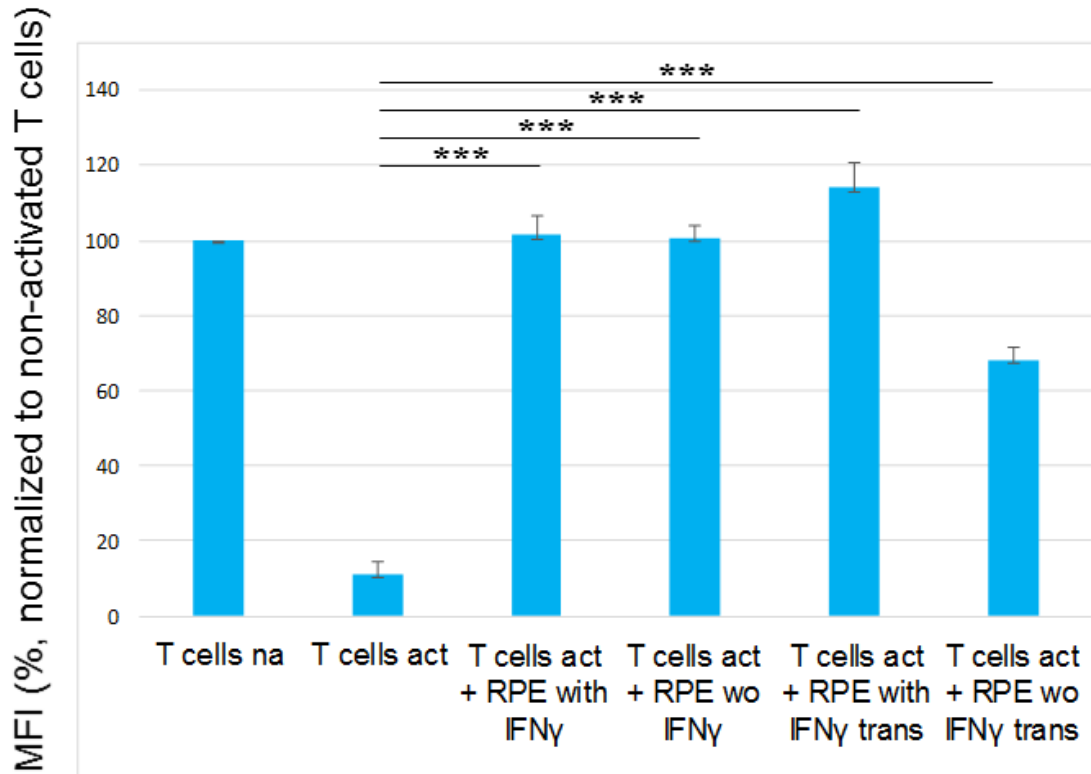

### T cell proliferation was highly attenuated by co-culture with hESC-RPE cells

PBMCs were labeled with CFSE. The cells were then stimulated with anti-CD3/anti-CD28 antibodies and co-cultured for 4 days with RPE cells that were pre-treated or not with IFN $\gamma$ . The level of proliferation was analyzed within the CD3<sup>+</sup> gate. PBMCs were co-cultured with RPE cells directly or using transwells (**trans**). The level of staining with CFSE in the non-activated CD3<sup>+</sup> T cells that didn't proliferate was set as 100%. \*\*\* p $\leq$ 0.001

Figure S4

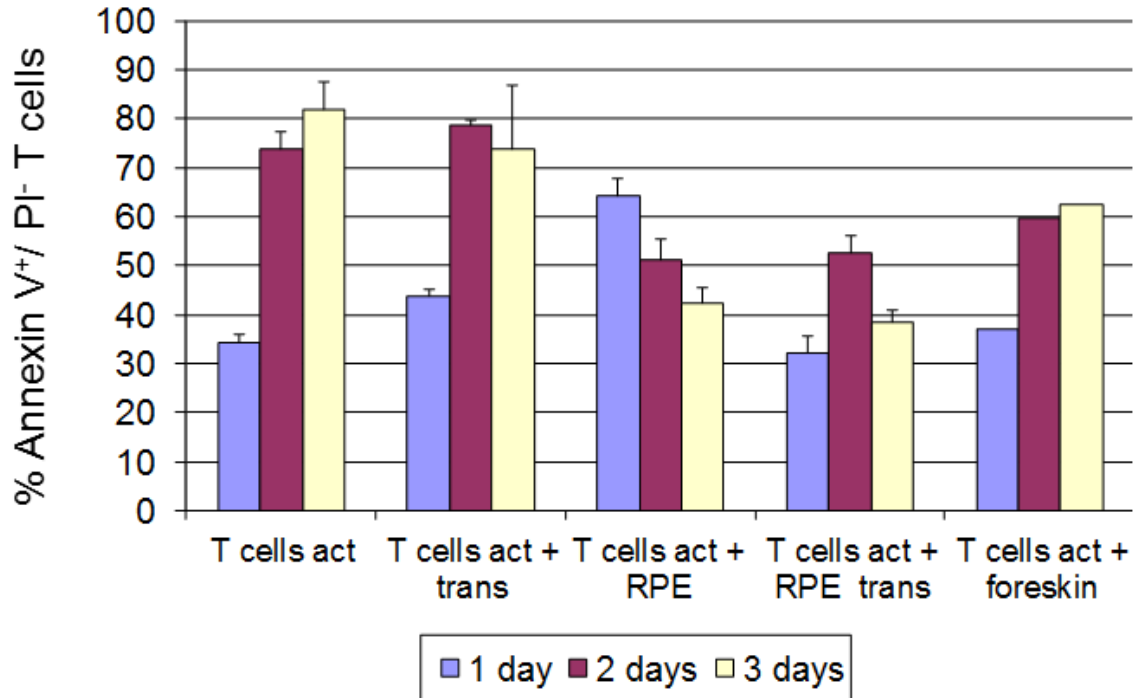

#### T cell apoptosis was increased at day 1 after co-culture with hESC-RPE cells

PBMCs were stimulated with anti-CD3/anti-CD28 antibodies and co-cultured for 1-3 days with RPE cells. PBMCs were co-cultured with RPE cells directly or using transwells (trans). As a control, PBMCs were incubated with foreskin cells. PBMCs were labeled with annexin V and PI and the percentage of apoptotic annexin V<sup>+</sup>/PI<sup>-</sup> cells was analyzed. The level of apoptosis was analyzed within the population of CD3<sup>+</sup> T cells; na - non-activated T cells, act - cells activated with anti-CD3/anti-CD28 antibodies.

Figure S5

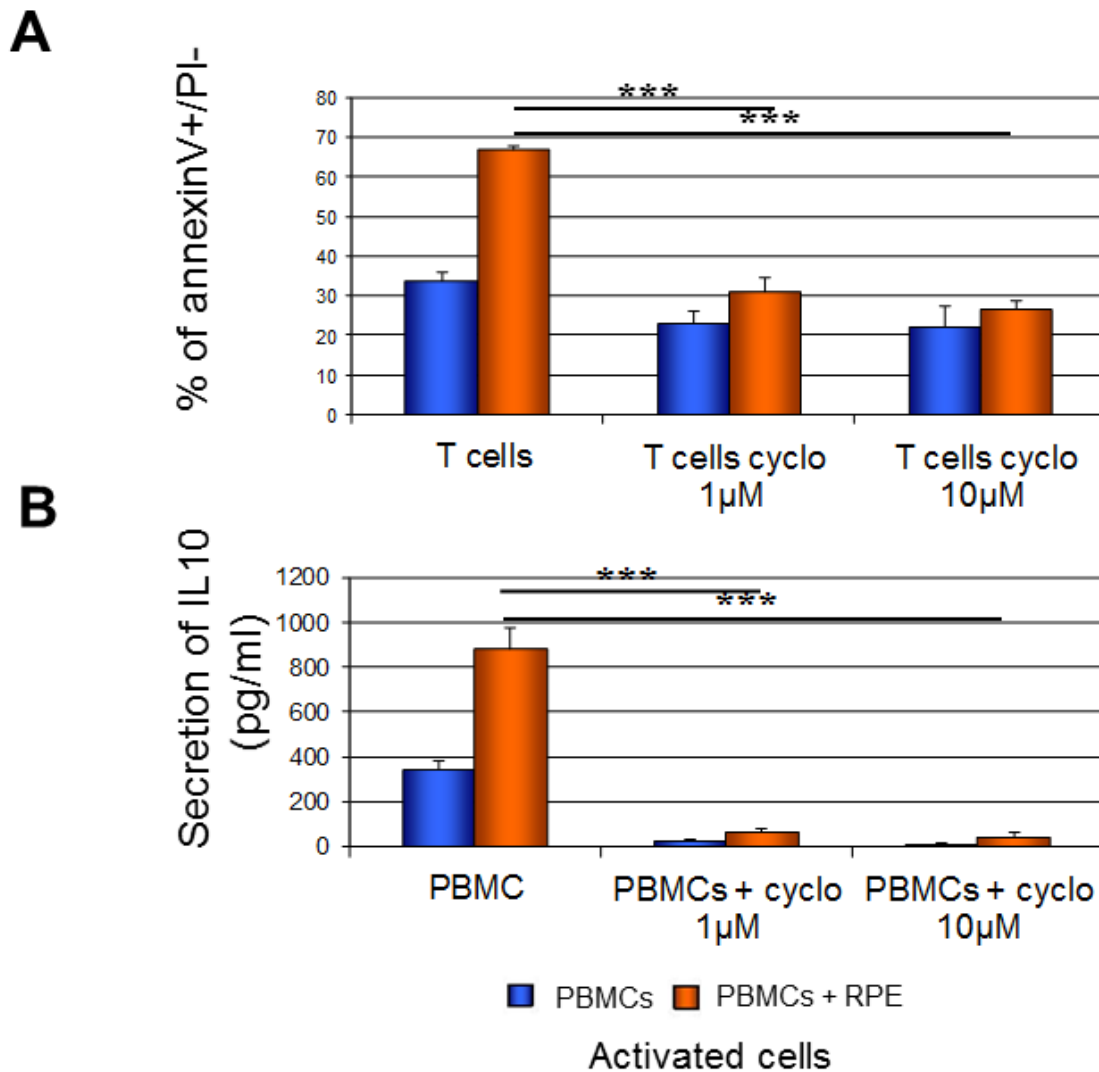

### Cyclosporine significantly reduces the RPE cells-induced T cell apoptosis and secretion of IL10

(A) PBMCs were stimulated with anti-CD3/anti-CD28 antibodies and co-cultured for 1 day with RPE cells in the presence or absence of cyclosporine (**cyclo**). The PBMCs were then labeled with annexin V and PI. The population of CD3<sup>+</sup> T cells was analyzed for the percentage of apoptotic (annexin V<sup>+</sup>/PI<sup>-</sup>) cells. (B) ELISA analysis of the secretion of IL10 by PBMCs that were stimulated with anti-CD3/anti-CD28 antibodies and co-cultured for 1 day with RPE cells in the presence or absence of cyclosporine (**cyclo**). \*\*\* p≤0.001

## Supplemental Experimental Procedures

### List of human primer sequences (forward and reverse 5'–3') and the length of PCR products:

TRAIL (CCCAATGACGAAGAGAGTATGA, GGAATAGATGTAGTAAAACCCT; 359bp)  
PDL1 (AAACAATTAGACCTGGCTG, TCTTACCACTCAGGACTTG; 399bp)  
Fas ligand (GGTCCATGCCTCTGGAATGG, CACATCTGCCAGTAGTGCA; 249bp)  
IDO (GCAAATGCAAGAACGGGACACT; TCAGGGAGACCAGAGCTTTCACAC; 463 bp)  
IL6 (ATGAACTCCTTCTCCACAAGC, GAAGAGCCCTCAGGCTGGACT; 628bp)  
IL18 (GCTTGAATCTAAATTATCAGTC, CAAATTGCATCTTATTATCATG; 334bp)  
IL15 (GATTTACCGTGGCTTTGAGTAATGAG, GAATCAATTGCAATCAAGAAGTG; 522bp)  
IL12A (TTCACCACTCCCAAACCTGC, GAGGCCAGGCAACTCCCATTAG; 225bp)  
HLA-DR (TGGGACCATCTTCATCATCAAGG, GGGCATTCCATAGCAGAGACAGAC;  
379bp)  
Arginase I (TGGAAACTTGCATGGACA, AAGTCCGAAACAAGCCAA; 253 bp)  
MIF (GTTCTCTCCGAGCTCACCCAGCAGC, GCAGCTTGCTGTAGGAGCGGTTCTG;  
185bp)  
VEGF (ACATTGTTGGAAGAAGCAGC, ATCCTGCCCTGTCTCTCTGT; 231 bp)  
TGFβ1 (CGGAGTTGTGCGGCAGTGGTTGA, GCGCCCGGGTTATGCTGGTTGTA; 450bp)  
GAPDH (AGCCACATCGCTCAGACACC, GTACTCAGCGCCAGCATCG; 301bp)
